# Supplementary material for: Extract from Black Soybean Cultivar A63 Extract Ameliorates Atopic Dermatitis-like Skin Inflammation in an Oxazolone-Induced Murine Model
Source: MDPI journal article supplement (doi:10.3390/molecules27092751), 2022-04-25
Supplement: s1 [file s1]

# **Korean black soybean A63 extract ameliorates atopic dermatitis-like skin inflammation in an oxazolone-induced murine model.**

Banzragch Dorjsembe<sup>1,4, +</sup>, Joon Won Lee<sup>2, +</sup>, Yongsoo Choi<sup>2, \*</sup>, and Jin Chul Kim<sup>3, \*</sup>

<sup>1</sup> Smart Farm Research Center, Korea Institute of Science and Technology, Gangneung, 25451, Republic of Korea.

<sup>2</sup> Natural Product Research Center, Korea Institute of Science and Technology, Gangneung, 25451, Republic of Korea.

<sup>3</sup> Natural Product Informatics Research Center, Korea Institute of Science and Technology, 25451, Gangneung, Republic of Korea

<sup>4</sup> KIST School, Korea University of Science and Technology, Daejeon, 34113, Republic of Korea

## **Supplementary material**

### **Fig.S1. DPPH assay (A) and Liver cell protective assay (B) result.**

Plant sampling and DPPH and liver cell protective assay were performed according to previous method of Xue et al (2017). Sample concentration of black soybean extracts were 0.25 mg/ml for DPPH assay and 0.1 mg/ml for Liver cell protective assay.

### **Fig.S2. UV Chromatogram of major components of A63 and ST.**

HPLC and UV detector used for isoflavone detection. Wavelength for isoflavone was 254 nm. Detected compounds were numbered as following:

1. Daidzin, 2. 6-Malonyldaidzin, 3. 6-Malonylgenistin, 4. Daidzein, 5. Genistin.

### **Fig.S3. Full length western blot images of Fig.5**

### **Fig.S4. Full length western blot images of Fig.6**

### **Table S1. List of Primers.**

### **Table S2. Comparing of dietary contents in various species of soybean extract**

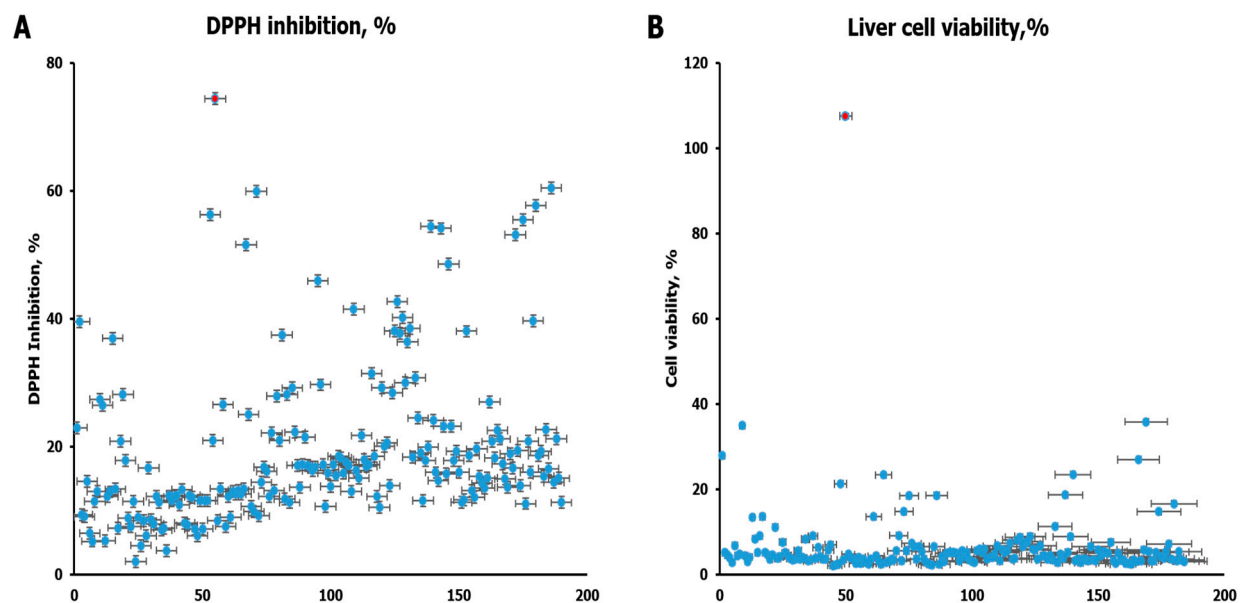

**Figure S1.** DPPH assay (A) and Liver cell protective assay (B) results.

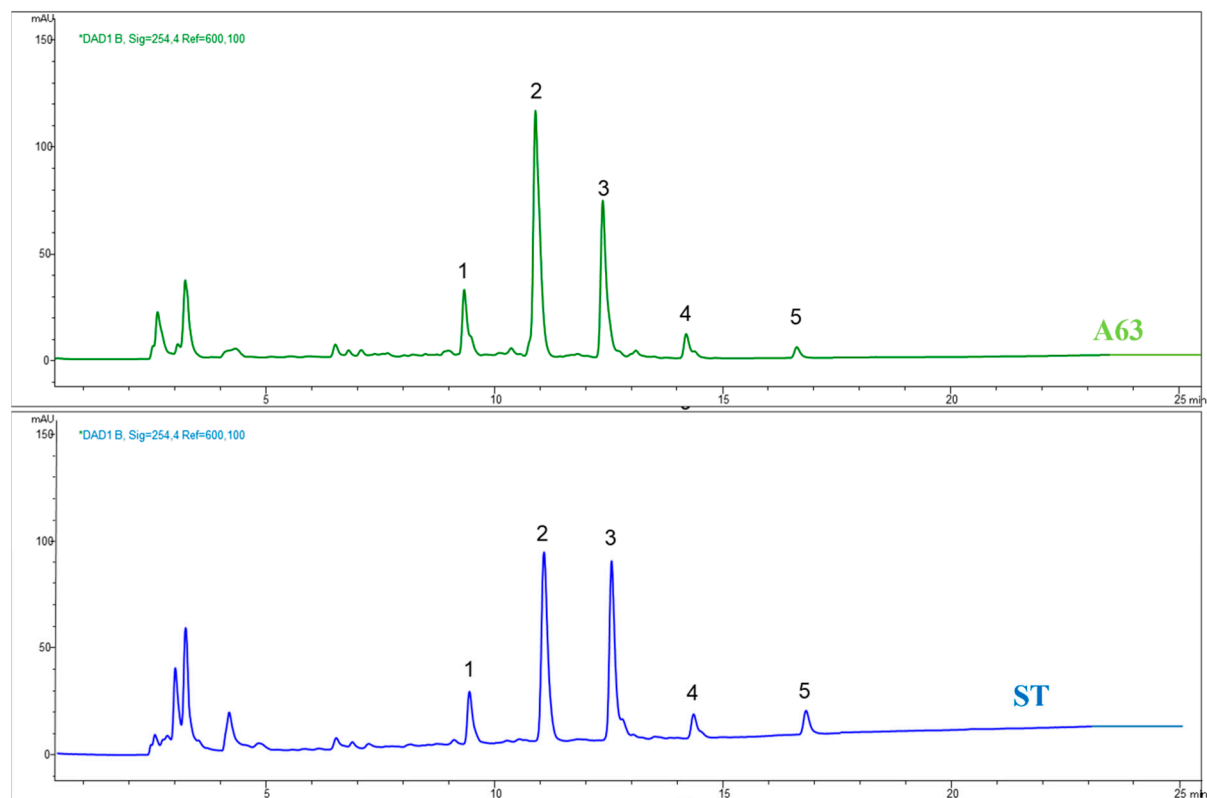

**Figure S2.** UV Chromatogram of major components of A63 and ST.

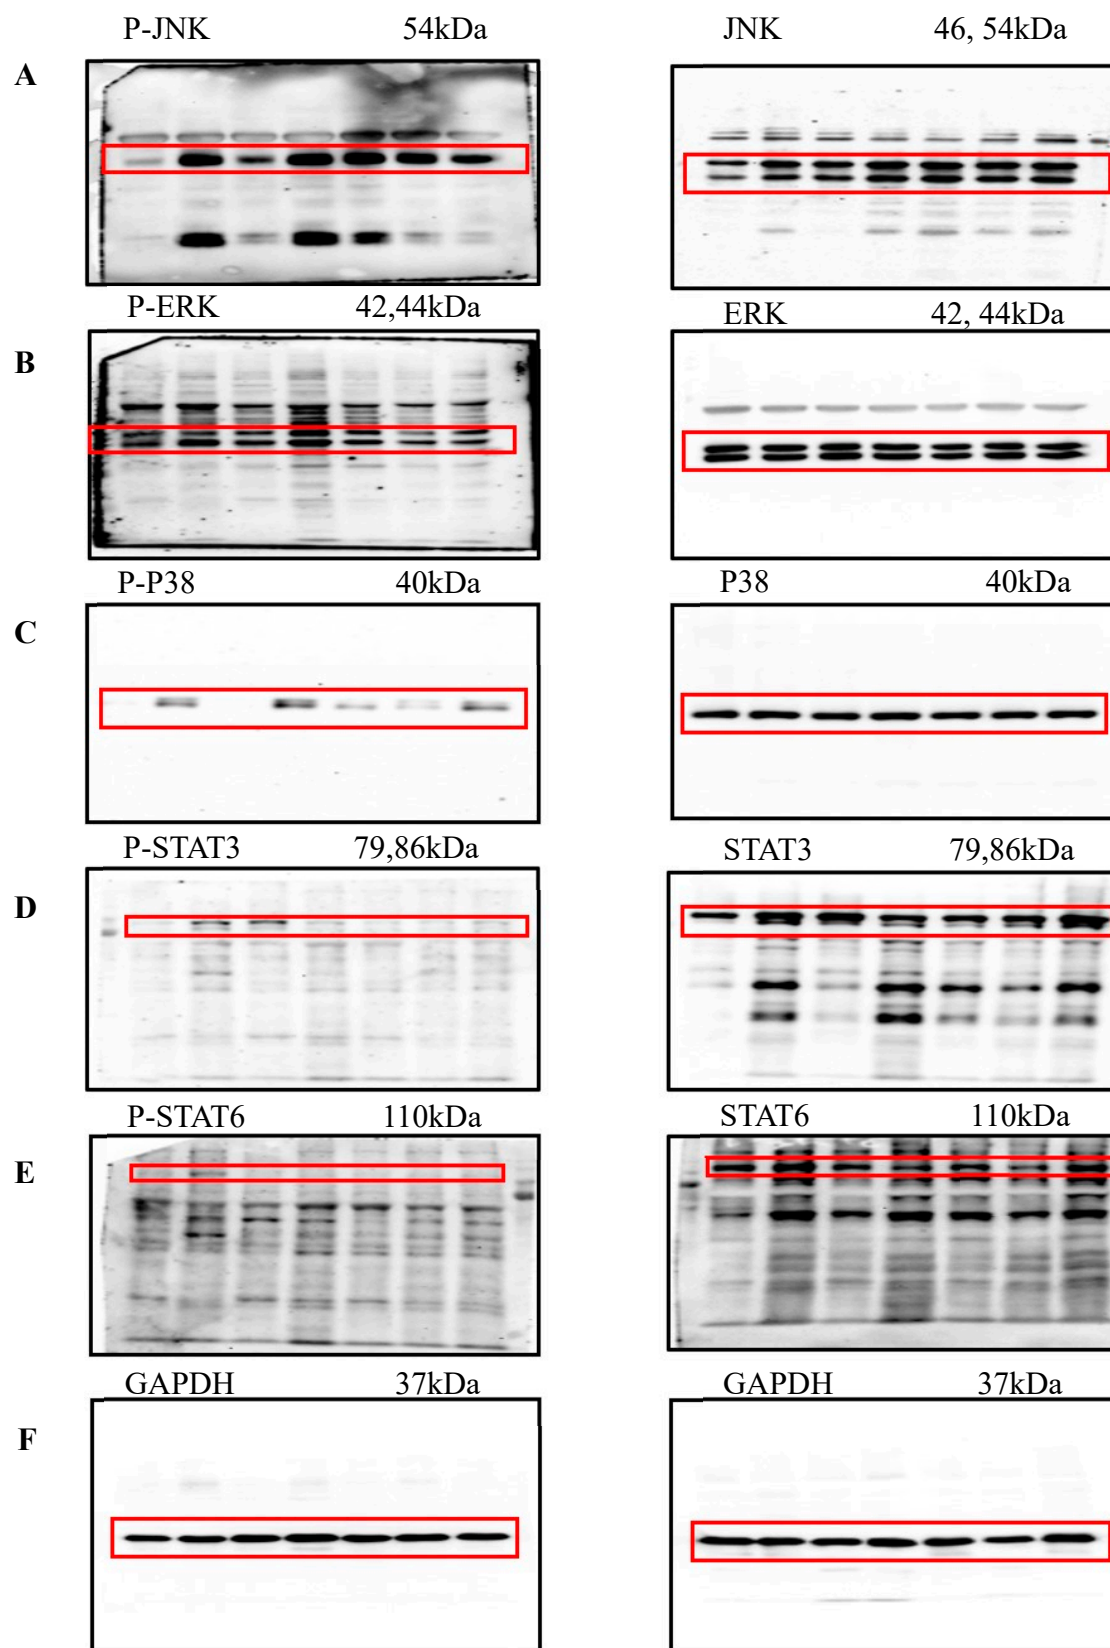

**Figure S3.** Full length western blot images of Figure 5.

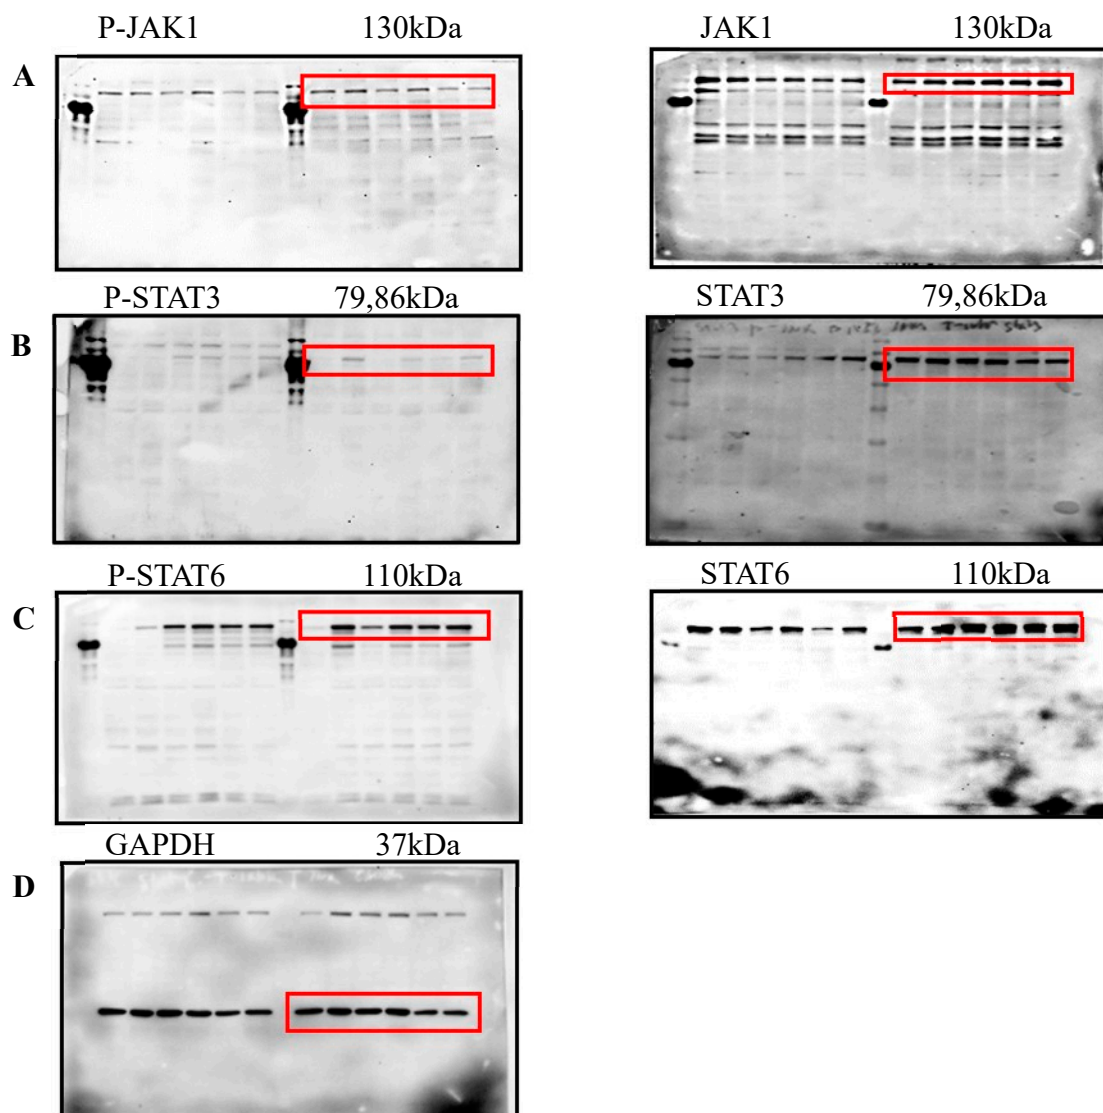

**Figure S4.** Full length western blot images of Figure 6.

**Table S1. List of Primers.**

| Primer name | Sequence               |
|-------------|------------------------|
| M_IL-4_F    | ATGGATGTGCCAAACGTCCT   |
| M_IL-4_R    | AAGCACCTTGGAAGCCCTAC   |
| M_IL-5_F    | CGTGGGGGTACTGTGGAAT    |
| M_IL-5_R    | AATCCAGGAATGCCTCGTC    |
| M_CCL17_F   | AATGTAGGCCGAGAGTGCTG   |
| M_CCL17_R   | TGCCCTGGACAGTCAGAAAC   |
| M_CCL26_F   | GTCCTGCTGCCCTAATTCA    |
| M_CCL26_R   | TCACTGGTGCAGCTCTTGTC   |
| H_CCL26_F   | CCTCCTGAGTCTCCACCTTG   |
| H_CCL26_R   | GGATGGGTACAGACTTTCTTGC |
| M_GAPDH_F   | CATGGCCTTCCTGTTCTTA    |
| M_GAPDH_R   | ACTTGGCAGGTTCTCCAGG    |

**Table S2. Comparing of dietary contents in various species of soybean extract**

|                  | Contents (mg/g)               |                     |                  |               |                        |                        |               |           |
|------------------|-------------------------------|---------------------|------------------|---------------|------------------------|------------------------|---------------|-----------|
|                  | Anthoc                        | Pro-anthoc          | Flavonols        | Isoflavonols  |                        |                        |               |           |
|                  | yanins                        | yanidins            |                  |               |                        |                        |               |           |
|                  | *Cyani<br>din-o-gl<br>ucoside | *Procyanid<br>in B2 | *Epicatec<br>hin | #Daidzi<br>n  | #6-Malon<br>yl daidzin | #6-Malon<br>ylgenistin | #Daidze<br>in | #Genistin |
| SCEL-1 (A6<br>3) | 4.99                          | 0.41                | 13.4             | 1.25-1.<br>36 | 5.74-6.38              | 3.45-3.70              | 0.27-0.5<br>3 | 0-0.16    |
| Seritae (ST)     | 2.67                          | 0.11                | 1.28             | 0.73-0.<br>94 | 4.18-4.43              | 4.26-4.52              | 0.08-0.3<br>8 | 0.09-0.38 |

\* Mass spectrometry analysis # High performance liquid chromatography analysis
